# Supplementary material for: Population Structure of Barley Landrace Populations and Gene-Flow with Modern Varieties
Source: PubMed Central journal article supplement (PMC3873955; doi:10.1371/journal.pone.0083891), 2013-12-27
Supplement: pone.0083891.s001.pdf [file pone.0083891.s001.pdf]

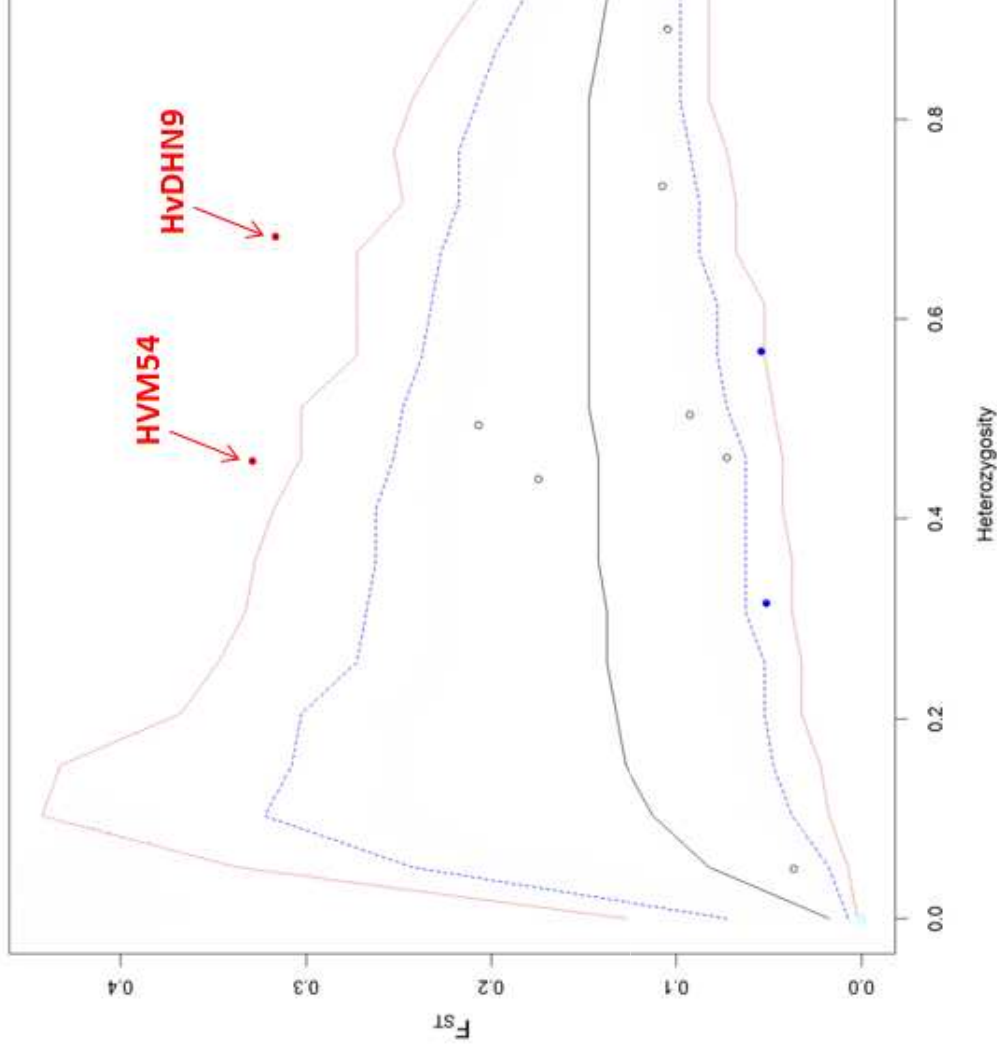

**Figure S1.**  $F_{ST}$  versus heterozygosity estimates, obtained using Arlequin, version 3.5, assuming a hierarchical model of migration.

Dashed blue line, 95% confidence interval; dashed red line, 99% confidence interval; solid grey line, median; filled blue circles, loci significant at the 5% level; red filled circles, loci significant at the 1% level; empty circles, putatively neutral loci.
