# Supplementary material for: Population Structure of Barley Landrace Populations and Gene-Flow with Modern Varieties
Source: PubMed Central journal article supplement (PMC3873955; doi:10.1371/journal.pone.0083891), 2013-12-27
Supplement: pone.0083891.s002.pdf [file pone.0083891.s002.pdf]

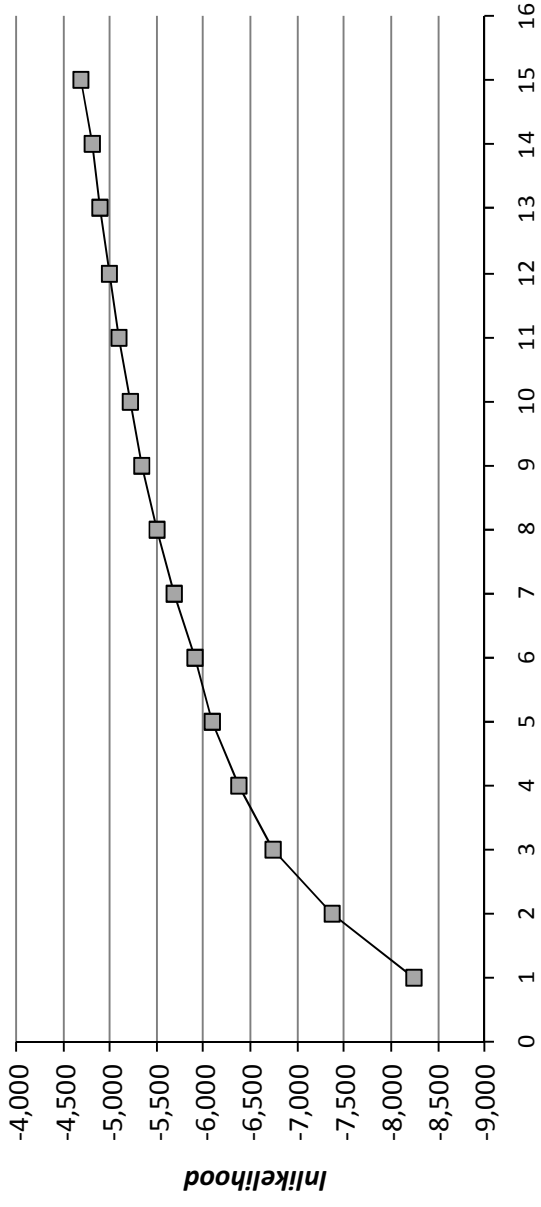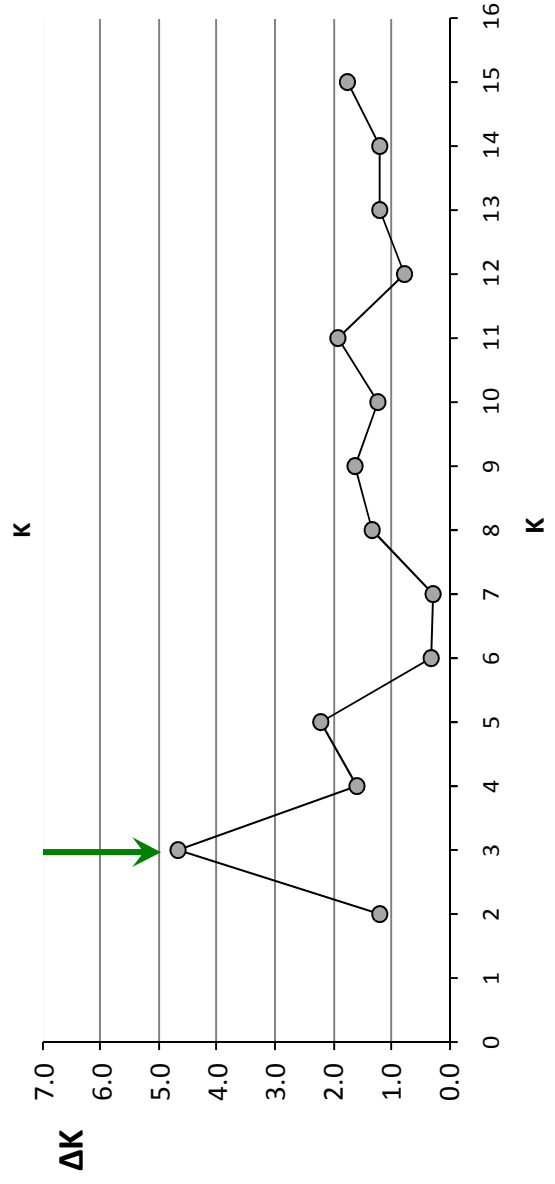

**Figure S2.** Average *Inlikelihood* values over 20 runs for increasing K-values, from 1 to 15, using the neutral markers dataset in the whole sample of 416 individuals and  $\Delta K$  values over 20 runs for increasing K-values, from 2 to 15. Green arrow identify the number of cluster (K) that maximized the  $\Delta K$  parameter.
