# Supplementary material for: Population Structure of Barley Landrace Populations and Gene-Flow with Modern Varieties
Source: PLoS One. 2013 Dec 27;8(12):e83891. doi: 10.1371/journal.pone.0083891 (PMC3873955; doi:10.1371/journal.pone.0083891)
Supplement: Table S4 — Pairwise FST between SL (SL90, SL99), Var2 and Var6. (XLSX) [file pone.0083891.s006.xlsx]

## Sheet: Table S4
Table S4. Pairwise FST values between SL (SL90, SL99), Var2 and Var6/Var6*.
	SL90	SL99	Var2	Var6/Var6*	VAR/VAR*
SL90	-
SL99	0.02	-
Var2	0.33	0.34	-
Var6/Var6*	0.26 / 0.28*	0.26 / 0.28*	0.14 / 0.14*	-
VAR/VAR*	0.27 / 0.28*	0.26 / 0.28*	-	-	-
	SL		Var2	Var6 / Var6*	VAR/VAR*
SL	-
Var2	0.33		-
Var6 / Var6*	0.25 / 0.27*		0.14 / 0.14*	-
VAR/VAR*	0.26 / 0.28*		-	-	-
Var6* = Var6 excluding the three control varieties MICUCCIO, PATTYAN and ZINGARIA; VAR* = VAR excluding the three control varieties MICUCCIO, PATTYAN and ZINGARIA
